# Supplementary material
Source: publisher figshare collection journal article supplement (https://gsajournals.figshare.com/articles/dataset/_/13146365)
Supplement: Supplementary file 1 [file 1]

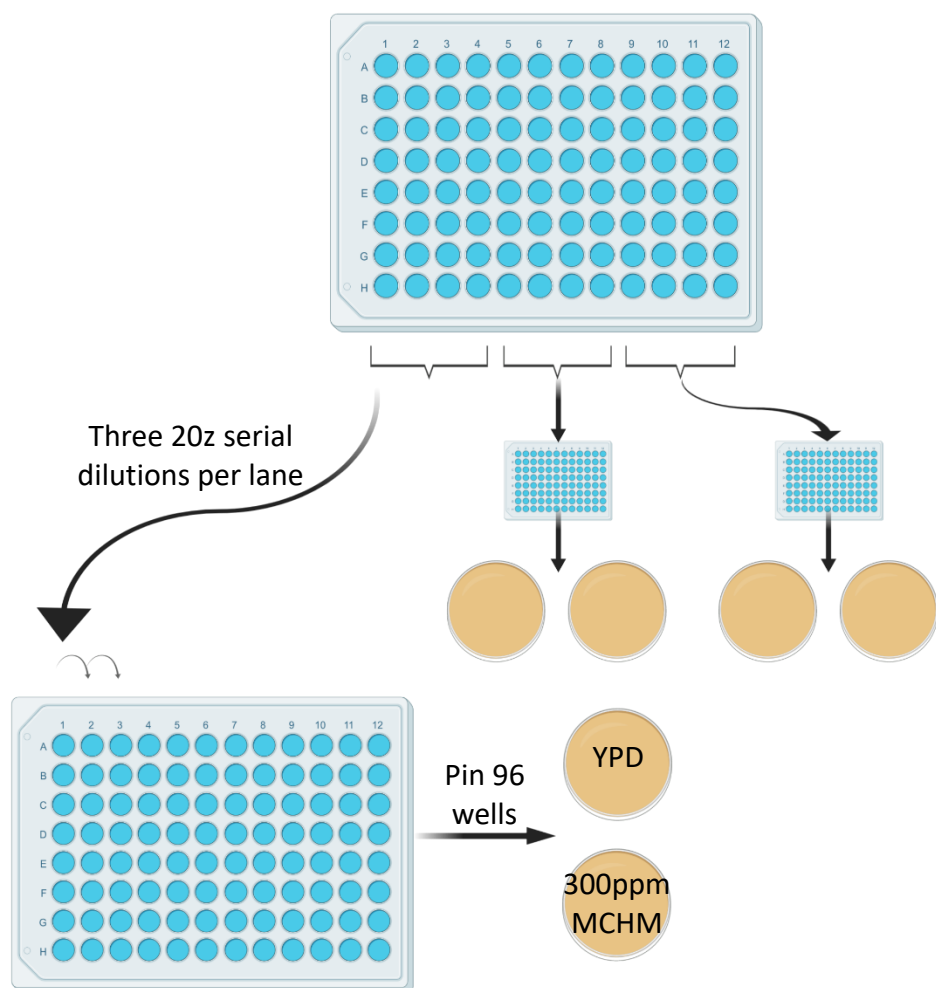

Supplemental Figure 1 Ayers *et al.*, 2020

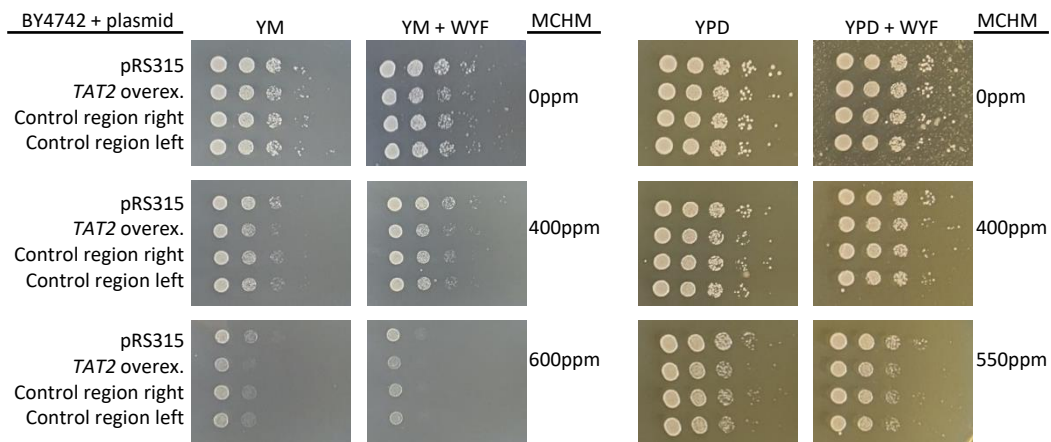

Supplemental Figure 2 Ayers *et al.*, 2020

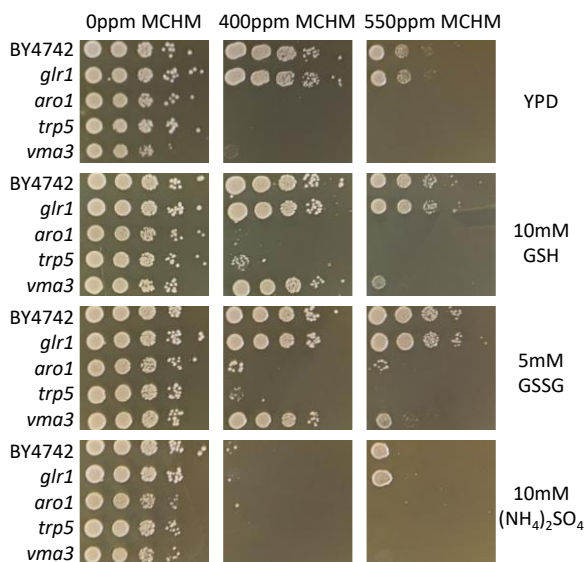

Supplemental Figure 3 Ayers *et al.*, 2020

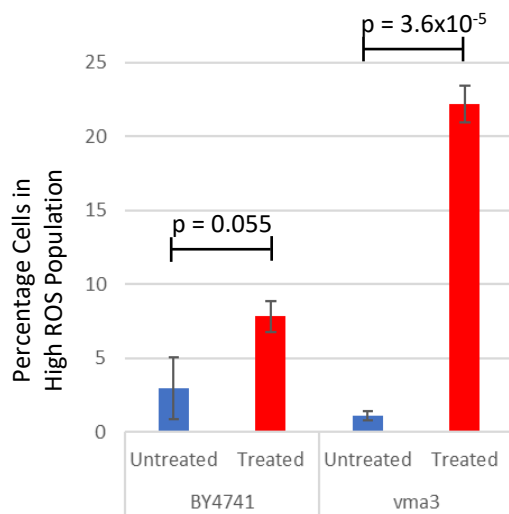

Supplemental Figure 4 Ayers *et al.*, 2020
